# Supplementary material for: The Glass is Half-Full: Overestimating the Quality of a Novel Environment is Advantageous
Source: PLOS journal article supplement (doi:10.1371/journal.pone.0034578), 2012-04-03
Supplement: S1 (10.1371/journal.pone.0034578.s001) [file journal.pone.0034578.s001]

| parameter                          | description                                                                                                                                                                                                                                                                                       | value/s                              |
|------------------------------------|---------------------------------------------------------------------------------------------------------------------------------------------------------------------------------------------------------------------------------------------------------------------------------------------------|--------------------------------------|
| <i>bites</i>                       | the number of food units to be consumed throughout the simulation                                                                                                                                                                                                                                 | 100-100,000<br>[food-units]          |
| <i>mean patch quality</i>          | the mean Poisson distributed number of food units available in a new patch; the quality of landscape.                                                                                                                                                                                             | 100<br>[food-units/patch]            |
| <i>presumed mean patch quality</i> | the initial belief of the forager regarding the landscape quality; values >100 correspond to ‘optimism’ while values <100 correspond to ‘pessimism’.                                                                                                                                              | 25-175<br>[food-units/patch]         |
| <i>mean travel time</i>            | the mean exponentially distributed travel time across the landscape; the average time required to locate a new patch.                                                                                                                                                                             | 10<br>[time-units]                   |
| <i>food growth rate</i>            | the logistic renewal rate of food patches                                                                                                                                                                                                                                                         | 0.001<br>[time-units <sup>-1</sup> ] |
| <i>handling time</i>               | the time required to process a single food unit                                                                                                                                                                                                                                                   | 1<br>[time-units]                    |
| <i>search rate</i>                 | the fraction of a patch covered by the forager during each time spent searching for food.                                                                                                                                                                                                         | 0.01<br>[patch/time-units]           |
| $\theta$                           | the linear operator determining the rate of information update. If $\theta = 0$ the forager never learns and thus maintain its initial beliefs throughout the simulation; if $\theta = 1$ the forager would believe the mean patch quality is equal to those characterising its current location. | 0.01                                 |
